# Supplementary material for: Facemask analyses for the non-invasive detection of chronic and acute P. aeruginosa lung infections using nanoparticle-based immunoassays
Source: Royal Society of Chemistry journal article supplement (doi:10.1039/d3an00979c), 2023-01-01
Supplement: d3an00979c1.pdf [file d3an00979c1.pdf]

## Supporting information for:

### **Facemask Analyses for the Non-Invasive Detection of Chronic and Acute *P. aeruginosa* Lung Infections Using Nanoparticle-based Immunoassays**

David Delgado-Cano,<sup>1</sup> Antonio Clemente,<sup>1,2,3\*</sup> Cristina Adrover-Jaume,<sup>1,2,#</sup> Andreu Vaquer,<sup>1,2,#</sup> Meritxell López,<sup>4,5,6,†</sup> Rocío Martínez,<sup>4,6,†</sup> Isabel M Roig,<sup>6,†</sup> Amanda Iglesias,<sup>4,5</sup> Borja G Cosío,<sup>4,5,6</sup> and Roberto de la Rica.<sup>1,3</sup>

<sup>1</sup>Multidisciplinary Sepsis Group, Hospital Universitario Son Espases, Health Research Institute of Balearic Islands (IdISBa), Palma de Mallorca, Spain

<sup>2</sup>Department of Chemistry, University of the Balearic Islands, Palma de Mallorca, Spain

<sup>3</sup>CIBER de Enfermedades Infecciosas (CIBERINFEC), Instituto de Salud Carlos III Madrid, Spain

<sup>4</sup>Inflamación, reparación y cáncer en enfermedades respiratorias (i-RESPIRE), Hospital Universitario Son Espases, Health Research Institute of Balearic Islands (IdISBa), Palma de Mallorca, Spain

<sup>5</sup>CIBER de Enfermedades Respiratorias (CIBERES), Instituto de Salud Carlos III, Madrid, Spain

<sup>6</sup>Department of Respiratory Medicine, Hospital Universitario Son Espases, Palma de Mallorca, Spain

#Contributed equally; †Contributed equally.

\*Corresponding author: [antonio.clemente@uib.cat](mailto:antonio.clemente@uib.cat)

## TABLE OF CONTENTS:

**Figure S1:** Procedures for wetting and blocking polypropylene by low and high pressure.

**Table S1:** Bacterial etiology of the respiratory infections in the patients included in the study.

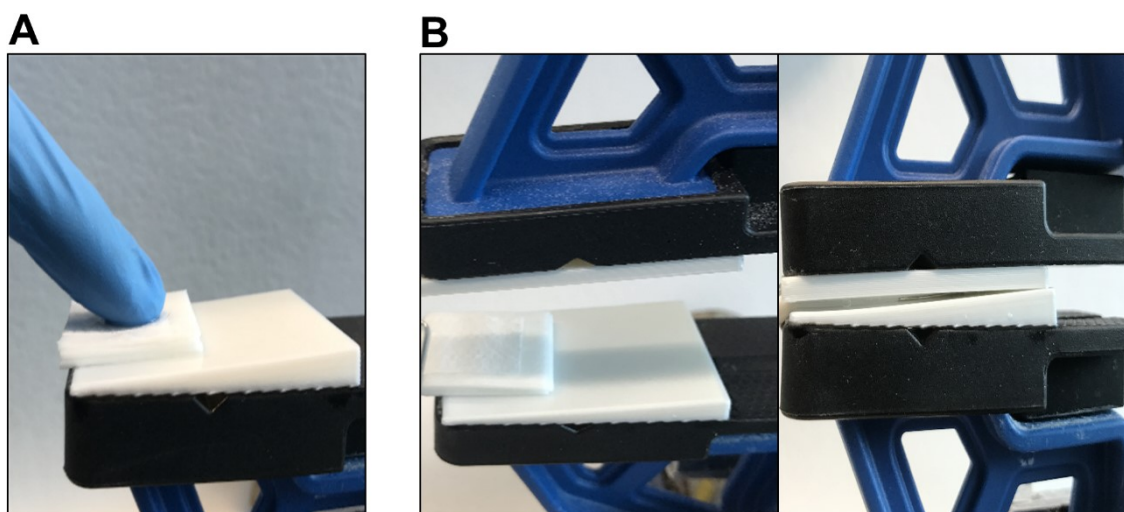

**Figure S1. Procedures for wetting and blocking polypropylene by low and high pressure.** Polypropylene pieces with different degree of hydrophilicity are obtained by placing them onto blotting papers soaked with PBS or PBS-BSA and applying (A) lightly pressing with the finger or (B) high pressure using a clamp tool for 10 s.

**Table S1:** Bacterial etiology of the respiratory infections in the patients included in the study.

| <b>Patient</b> | <b>Bacterial infection</b>                           | <b>Infection status</b> | <b>Chronic lung condition</b> |
|----------------|------------------------------------------------------|-------------------------|-------------------------------|
| 1              | <i>Streptococcus pneumoniae</i>                      | Acute                   | COPD                          |
| 2              | <i>Klebsiella pneumoniae</i>                         | Acute                   | COPD                          |
| 3              | <i>Streptococcus pneumoniae</i>                      | Acute                   | COPD                          |
| 4              | <i>Moraxella catarrhalis</i>                         | Acute                   | COPD                          |
| 5              | <i>Bordetella bronchiseptica</i>                     | Acute                   | COPD                          |
| 6              | <i>Pseudomonas aeruginosa/Staphylococcus aureus*</i> | Chronic/Acute*          | COPD                          |
| 7              | <i>Pseudomonas aeruginosa</i>                        | Chronic                 | COPD                          |
| 8              | <i>Pseudomonas aeruginosa</i>                        | Chronic                 | COPD                          |
| 9              | <i>Pseudomonas aeruginosa</i>                        | Chronic                 | Diaphragmatic hernia          |
| 10             | <i>Pseudomonas aeruginosa</i>                        | Chronic                 | Bronchiectasis                |
| 11             | <i>Pseudomonas aeruginosa</i>                        | Acute                   | COPD                          |

\*In this patient with a *P. aeruginosa* chronic infection, a sputum culture test conducted at the time of facemask sampling revealed an active respiratory infection caused by *Staphylococcus aureus*. COPD: chronic obstructive pulmonary disease.
